# Supplementary material
Source: PubMed Central journal article supplement (PMC5423837)
Supplement: NIHMS847626-supplement-3.pdf [file NIHMS847626-supplement-3.pdf]

```
1  #!/usr/bin/perl
2
3  # Author: Swapnil Bhatia (swapnilb at bu.edu)
4  # Thu Jan 19 15:06:54 EST 2017
5  # Computes angular difference between measured and signal vectors of
6  # BLADE circuits. Computes dynamic range, angles between all boolean
7  # functions, and measured circuit to all functions. Exports to CSV and
8  # JSON. Needs input as CSV in a specific format described in the
9  # comments.
10 #
11 # Send questions to swapnilb, bweinbe, or wilwong at bu dot edu.
12
13 # Tested on:
14 # perl 5, version 12, subversion 4 (v5.12.4) built for i386-linux-thread-multi
15 # Linux synbiotools.bu.edu 4.8.10-300.fc25.x86_64 #1 SMP Mon
16 # Nov 21 18:59:16 UTC 2016 x86_64 x86_64 x86_64 GNU/Linux
17
18 use Data::Dumper;
19 use Math::Trig;
20 use Storable;
21 use JSON;
22 use POSIX;
23
24 $Data::Dumper::Sortkeys = 1;
25 $Data::Dumper::Pair = ':';
26 $Data::Dumper::Quotekeys = 1;
27
28 my @bitVector;
29
30 $n = 2; # n is the number of inputs to the circuits
31 $len = 2 * 2**$n; # we have two outputs, so we have 2 x 2^n independent bits
32 $#circuitToPlot = $ARGV[0];
33
34 if ($#ARGV < 0) {
35     print STDERR "usage: computeAllAngulars <csv formatted data file>\n";
36     exit;
37 }
38
39 # This hash holds all the boolean functions on n input bits with two outputs.
40 my %allTT = ();
41
42 # Initialize the bit vector used to represent the boolean function to
43 # 0.
44 for($i=0; $i<$len; $i++) {
45     push(@bitVector, 0);
46 }
```

```

47
48 # Each boolean function gets a unique circuit identifier. This is used
49 # as a part of the hash key in allTT.
50 my $circuitId = 0;
51
52 # We first generate all possible boolean functions and initialize all
53 # the values that we can at this point. We do this by taking a vec 0
54 # bitvector and incrementing it, until we have covered all possible
55 # bit strings.
56 do {
57
58     # We use the following vars to also save the two outputs, i.e. two
59     # functions separately, for convenience and analysis later, in
60     # addition to saving the entire function, i.e. both outputs,
61     # together.
62     $evenTT = 0;
63     $oddTT = 0;
64
65     # Here, len is the size of the boolean function, that is, 2 x 2^n.
66     for($i=0; $i<$len; $i++) {
67
68         # Each function is initially called "Unbuilt-k", where k is
69         # some integer identifier. Once we read data that shows that
70         # function was tested in the laboratory, we move it into a new
71         # hash and fill in the data gathered in the laborator.
72
73         $allTT{"Unbuilt-$circuitId"}{truthTable>{"$i"}{truthTableOutput}
74             = $bitVector[$len-1-$i];
75
76         # Initialize other fields to reasonable values.
77         $allTT{"Unbuilt-$circuitId"}{truthTable>{"$i"}{mean} = "1.0";
78
79         # Add up the 1-bits to compute vector magnitude later.
80         $allTT{"Unbuilt-$circuitId"}{truthTableVectorMag} += $bitVector[$len-1-$i];
81
82         # Compute the integer value of each function, represented as a
83         # bit string. We use this later to have a concise way to
84         # describe a boolean function, just by this integer.
85         if ($i % 2 == 0) {
86             $evenTT += 2**(2**$n-1-$i/2) * $bitVector[$i];
87         } else {
88             $oddTT += 2**(2**$n-1-($i-1)/2) * $bitVector[$i];
89         }
90     }
91 }
92

```

```
93 # Initially, all boolean functions are "Unbuilt."  
94 $allTT{"Unbuilt-$circuitId"}{built} = "No";  
95  
96 # We compute integer descriptors for each function.  
97 $allTT{"Unbuilt-$circuitId"}{hexTruthTable} = sprintf("%X", $circuitId);  
98 $allTT{"Unbuilt-$circuitId"}{hexGfpTruthTable} = sprintf("%X", $evenTT);  
99 $allTT{"Unbuilt-$circuitId"}{hexMchTruthTable} = sprintf("%X", $oddTT);  
100  
101 # We initialize vector magnitudes for the binary function itself.  
102 $allTT{"Unbuilt-$circuitId"}{meanVectorMag} = sqrt(8.0);  
103 $allTT{"Unbuilt-$circuitId"}{truthTableVectorMag}  
104     = sqrt($allTT{"Unbuilt-$circuitId"}{truthTableVectorMag});  
105  
106 # Move on to the next boolean function, and give it a new  
107 # identifier.  
108 $circuitId++;  
109  
110 # Continue, until there are no more bitstrings left to process.  
111 } while (getNextTT() == 1);  
112  
113 # We explicitly ignore the trivial function Contradiction.  
114 delete $allTT{"Unbuilt-0"};  
115  
116 # Count the total number of functions enumerated.  
117 $count = scalar keys %allTT;  
118  
119 # Silly check point.  
120 #print STDERR "Total circuits = $count\n";  
121  
122 # Print entire data structure with good formatting, thanks to Dumper::  
123 #print Dumper(%allTT);  
124  
125 # Proceed after all of this looks correct.  
126 #exit;  
127  
128 ## Generation of boolean functions is complete. We now move on to  
129 #reading in laboratory data on some of these boolean functions.  
130  
131 ##### Reading in lab data #####  
132  
133 $inFile = $ARGV[0];  
134  
135 open(IN, "<$inFile" ) or die;  
136  
137 # IMPORTANT: We assume that the first line of the file has clear  
138 # column headings for human readability. We skip that line.
```

```
139 readline(IN);
140
141 # We initialize an empty hash table. This will hold the boolean
142 # functions which have been built in the lab and tested. We call these
143 # "circuits" — implementations of abstract boolean functions.
144 my %circuit = ();
145
146 # This somewhat long loop reads in the data into this new hash table.
147 while(!eof(IN)) {
148
149     # Each line of the file contains data about a SINGLE circuit.
150     # Thus, data on each circuit is newline delimited. We follow *nix
151     # conventions for newline and convert the file (not shown here,
152     # and done externally) to this convention.
153     $line = readline(IN);
154
155     # The fields in each line of circuit data are delimited by commas.
156     # We split the line we just read into fields.
157     @fields = split(/,/, $line);
158
159     # We know by predefined convention that the first field (index 0) is a
160     # circuit identifier.
161     $circuitId = $fields[0];
162
163     # We know by predefined convention that the next four columns
164     # describe a BLADE device's composition. We save it with dot
165     # notation and use it as a human readable descriptor later.
166     $circuitStructure = "";
167     for($i=1; $i<5; $i++) {
168         $circuitStructure = $circuitStructure . "." . $fields[$i];
169     }
170
171     # Remove prefix dot and save into this device's entry in our hash
172     # table.
173     $circuitStructure =~ s/^.//;
174     $circuit{"$circuitId"}{structure} = $circuitStructure;
175
176     # We mark this device as having been built and tested in the
177     # laboratory.
178     $circuit{"$circuitId"}{built} = "Yes";
179
180     # We know from predefined convention that the next eight columns
181     # contain the intended boolean function. We read this in as a
182     # single boolean function, as well as separate it out into the two
183     # outputs below.
184
```

```

185     $startField = 5;
186     $endField = 13;
187
188     my @circuitOutputs;
189     $mag = 0;
190     $circuitBinToDec = 0;
191     for($i=$startField; $i<$endField; $i++) {
192         $row = $i-$startField;
193         $circuit{"$circuitId"}{truthTable}{$row}{truthTableOutput} = $fields[$i];
194
195         # In addition to reading in the boolean function, we also
196         # compute the vector magnitude of the function as a bit
197         # vector, and it's integer value, as a succinct descriptor,
198         # just as we had one in the list of unbuilt functions hash
199         # table above.
200         $mag += ($fields[$i] * $fields[$i]);
201         $circuitBinToDec += ((2**$row) * $fields[$i]);
202     }
203
204     $circuit{"$circuitId"}{truthTableVectorMag} = sqrt($mag);
205
206     # We will use the descriptor also for display to users as a hex
207     # value, to enable quick comprehension of the outputs for any
208     # combination of inputs.
209     $circuit{"$circuitId"}{hexTruthTable} = sprintf("%X", $circuitBinToDec);
210
211     # Finally, we delete this circuit from the list of unbuilt
212     # circuits.
213     delete $allTT{"Unbuilt-$circuitBinToDec"};
214
215     # We also separate the boolean function by output into two
216     # separate but related functions: one reported by GFP and another
217     # by mCherry, as we know from out-of-band agreement.
218
219     # We first separate out the GFP output. We compute vector
220     # magnitude and the number of "true" values to help determine
221     # later if our dot product metric would be computable for this
222     # function. We also compute and save a succinct integer
223     # descriptor.
224     $magGFP = 0;
225     $cntlsGFP = 0;
226     $circuitBinToDec = 0;
227     for($i=$startField; $i<$endField; $i+=2) { # skip mCherry values
228         $row = ($i-$startField)/2;
229         $circuit{"$circuitId"}{truthTableGfp}{$row}{truthTableOutput} = $fields[$i];
230         $magGFP += ($fields[$i] * $fields[$i]);

```

```

231     if ($fields[$i] =~ /1/) {
232         $cntlsGFP++;
233     }
234     $circuitBinToDec += ((2**$row) * $fields[$i]);
235 }
236 $circuit{"$circuitId"}{truthTableVectorMagGfp} = sqrt($magGFP);
237 $circuit{"$circuitId"}{truthTableTotalOnesGfp} = $cntlsGFP;
238 $circuit{"$circuitId"}{hexGfpTruthTable} = sprintf("%X", $circuitBinToDec);
239
240 # We work similarly on the mCherry output.
241 $magMCh = 0;
242 $cntlsMCh = 0;
243 $circuitBinToDec = 0;
244 for($i=$startField+1; $i<$endField; $i+=2) { # skip GFP values
245     $row = ($i-($startField + 1))/2; # truth table row of just mcherry output
246     $circuit{"$circuitId"}{truthTableMch}{$row}{truthTableOutput} = $fields[$i];
247     $magMCh += ($fields[$i] * $fields[$i]);
248     if ($fields[$i] =~ /1/) {
249         $cntlsMCh++;
250     }
251     $circuitBinToDec += ((2**$row) * $fields[$i]);
252 }
253 $circuit{"$circuitId"}{truthTableVectorMagMch} = sqrt($magMCh);
254 $circuit{"$circuitId"}{truthTableTotalOnesMch} = $cntlsMCh;
255 $circuit{"$circuitId"}{hexMchTruthTable} = sprintf("%X", $circuitBinToDec);
256
257
258 # By predefined convention, we know that the next eight columns
259 # contain the output values measured for this device in the
260 # laboratory. We record these together and separately for each
261 # output. We also record them as capped and uncapped, as described
262 # below. And we read or compute basic summaries like mean and vector
263 # magnitude, treating the tuple of values as a real vector.
264
265 $startField = 13;
266 $endField = 21;
267
268 # We "cap" any measured value above 20,000 a.u. to 20,000 a.u., as
269 # at this level any such signal is considered sufficiently robust.
270 # Please see manuscript for a discussion of this capping or
271 # contact Ben Weinberg for specific questions.
272 my $CAP_VALUE = 20000.0;
273
274 # Note that we also store the uncapped values.
275
276 my @circuitMean;

```

```
277 $mag = 0;
278 for($i=$startField; $i<$endField; $i++) {
279     $row = $i-$startField;
280     $circuit{"$circuitId"}{truthTable>{"$row"}{uncappedMean} = $fields[$i];
281     $tmp = $fields[$i];
282     if ($tmp > $CAP_VALUE) {
283         $tmp = $CAP_VALUE;
284     }
285     $circuit{"$circuitId"}{truthTable>{"$row"}{mean} = $tmp;
286     $mag += ($tmp * $tmp);
287 }
288 $circuit{"$circuitId"}{meanVectorMag} = sqrt($mag);
289
290
291 # We repeat the process for the two outputs separately.
292 $magGFP = 0;
293 for($i=$startField; $i<$endField; $i+=2) {
294     $row = ($i-$startField)/2;
295     $circuit{"$circuitId"}{truthTableGfp>{"$row"}{uncappedMean} = $fields[$i];
296     $tmp = $fields[$i];
297     if ($tmp > $CAP_VALUE) {
298         $tmp = $CAP_VALUE;
299     }
300     $circuit{"$circuitId"}{truthTableGfp>{"$row"}{mean} = $tmp;
301     $magGFP += ($tmp * $tmp);
302 }
303 $circuit{"$circuitId"}{meanVectorMagGfp} = sqrt($magGFP);
304
305 $magMCh = 0;
306 for($i=$startField+1; $i<$endField; $i+=2) {
307     $row = ($i-($startField + 1))/2;
308     $circuit{"$circuitId"}{truthTableMch>{"$row"}{uncappedMean} = $fields[$i];
309     $tmp = $fields[$i];
310     if ($tmp > $CAP_VALUE) {
311         $tmp = $CAP_VALUE;
312     }
313     $circuit{"$circuitId"}{truthTableMch>{"$row"}{mean} = $tmp;
314     $magMCh += ($tmp * $tmp);
315 }
316 $circuit{"$circuitId"}{meanVectorMagMch} = sqrt($magMCh);
317
318
319
320
321 # Finally, we read the last eight columns which contain the
322 # standard error of mean for each measured output value. We save
```

```

323 # them together and separately for each output. This is currently
324 # unused for any computation.
325
326 $startField = 21;
327 $endField = 29;
328 for($i=$startField; $i<$endField; $i++) {
329     $row = $i-$startField;
330     $circuit{"$circuitId"}{truthTable}{$row}{standardErrorOfUncappedMean}
331         = $fields[$i];
332 }
333
334 ## GFP standard error of means separately recorded.
335 for($i=$startField; $i<$endField; $i+=2) {
336     $row = ($i-$startField)/2;
337     $circuit{"$circuitId"}{truthTableGfp}{$row}{standardErrorOfUncappedMean}
338         = $fields[$i];
339 }
340
341 ## MCh standard error of means separately recorded.
342 for($i=$startField+1; $i<$endField; $i+=2) {
343     $row = ($i-($startField+1))/2;
344     $circuit{"$circuitId"}{truthTableMch}{$row}{standardErrorOfUncappedMean}
345         = $fields[$i];
346 }
347 }
348 }
349
350 # This marks the end of the loop that reads in data from the file.
351
352 # We may pause and use this as a check point to confirm the number of
353 # built and unbuilt circuits against their true values.
354
355 $count = keys %allTT;
356 #print "Total Unbuilt circuits = $count\n";
357 #print Dumper(%allTT);
358 $count = keys %circuit;
359 #print "Total Built circuits = $count\n";
360
361
362 # We now move all the *unbuilt* boolean functions into the circuits
363 # hash table. Thus, our circuits hash table now comprises all boolean
364 # functions, with the unbuilt ones marked with a "No" under the
365 # "built" field.
366
367 @circuit{keys %allTT} = values %allTT;
368 $count = keys %circuit;

```



```
369 #print "Total Built circuits = $count\n";
370
371 # Here, we may pause and check that all the data read in appears to be
372 # correctly recorded.
373
374 ##print Dumper(\%circuit);
375 ##exit;
376
377
378 # We now proceed to compute the dot product metric.
379
380 # We also wish to compute the number of circuits whose closest boolean
381 # function is NOT the intended function. We loosely refer to them as
382 # "dysfunctional." We keep a count of such circuits.
383
384 $dysfunc = 0;
385
386 # This is the main loop that computes the dot product metric. We
387 # proceed in a sorted order by circuit identifier.
388
389 for my $circuitId1 (sort {$a <=> $b} keys %circuit) {
390
391     # We only consider functions that have been tested in the
392     # laboratory, skipping any function that has not been built.
393     if ($circuit{"$circuitId1"}{built} =~ /No/) {
394         #print "Skipping circuit $circuitId1\n";
395         next;
396     }
397
398     # We may print each circuit being analyzed to confirm that all
399     # built, and only those circuits, are being included in the
400     # analysis.
401     # print "Analyzing circuit $circuitId1: $circuit{"$circuitId1"}{hexTruthTable}\n";
402
403
404     # Below, we use the dot product to obtain the angle of the
405     # measured output to the intended boolean function.
406
407     # We begin with the full function taking both outputs together. We
408     # will compute this using the mean values of the measured outputs.
409     # Hence we refer to this as the mean dot product.
410     $ttMeanDotProduct = 0.0;
411
412     # We get a reference to the full function, from our data
413     # structure.
414     my $c1 = $circuit{"$circuitId1"}{truthTable};
```

```

415
416 # Then, for each input–output relation for this function, we
417 # compute the dot product between the signal vector, i.e., the
418 # measured output, and the function vector, i.e., the boolean
419 # function intended to be implemented.
420 for my $row (keys %{$c1}) {
421     $ttMeanDotProduct
422     += ($circuit{"$circuitId1"}{truthTable}{"$row"}{mean}
423        * $circuit{"$circuitId1"}{truthTable}{"$row"}{truthTableOutput});
424 }
425
426 # The angle between vectors is not computable if the magnitude of
427 # one of the vectors is zero. We check this, and if so, compute
428 # the angle. Else, we label it as "Undefined."
429 if ($circuit{"$circuitId1"}{meanVectorMag} > 0 && $circuit{"$circuitId1"}{truthTableVectorMag} > 0) {
430     $cosTheta
431     = $ttMeanDotProduct /
432       ($circuit{"$circuitId1"}{meanVectorMag} * $circuit{"$circuitId1"}{truthTableVectorMag});
433
434     # We save this value, calling it "self theta" to indicate the
435     # angle between measured and intended vectors, to contrast
436     # angles with all other functions.
437     $selfTheta = rad2deg(acos($cosTheta));
438     $circuit{"$circuitId1"}{theta} = $selfTheta;
439 } else {
440     $theta = "Undefined";
441 }
442
443 # This completes the computation of the angle between intended and
444 # measured vectors. We now move to computing the angle between
445 # measured and all possible function vectors. We also determine
446 # the function with the minimum angle, and the rank of the
447 # intended function, when all functions are sorted in ascending
448 # order of their angle with the measured vector. We use this as a
449 # proxy metric of whether or not a circuit satisfies the desired
450 # behavior.
451
452 my $min = 1000.0;
453 my $minCircuit = "";
454 my $rank = 0;
455
456 # This inner loop computes the angle between all possible boolean
457 # functions and the measured vector.
458 for my $circuitId2 (keys %circuit) {
459
460     # We first compute this, similarly as above, with the full

```

```

461     # function.
462     $ttMeanDotProduct = 0.0;
463     my $c1 = $circuit{"$circuitId1"}{truthTable};
464     for my $row (keys %{$c1}) {
465         $ttMeanDotProduct
466             += ($circuit{"$circuitId1"}{truthTable}{$row}{mean}
467                * $circuit{"$circuitId2"}{truthTable}{$row}{truthTableOutput});
468     }
469
470     # Only if the magnitudes are positive, can we compute the
471     # angle. Else, we mark it as "Undefined."
472     if (
473         $circuit{"$circuitId1"}{meanVectorMag} > 0 &&
474         $circuit{"$circuitId2"}{truthTableVectorMag} > 0
475     ) {
476         $cosTheta
477             = $ttMeanDotProduct
478               / ($circuit{"$circuitId1"}{meanVectorMag} * $circuit{"$circuitId2"}{truthTableVectorMag});
479         $theta = rad2deg(acos($cosTheta));
480     } else {
481         $theta = "Undefined";
482     }
483
484
485     # For each circuit, we save the angle it makes with all possible
486     # boolean functions, whenever it is defined.
487     $circuit{"$circuitId1"}{distanceTo}{$circuitId2}{theta} = sprintf("%.2f", $theta);
488
489     # For convenience, we save explicitly, the identifier of the
490     # function making the smallest angle with the current circuit.
491     if ($theta !~ /Undefined/) {
492         if ($min > $theta) {
493             $minCircuit = $circuitId2;
494             #print "$minCircuit is closer: $min > $theta\n"; ### DEBUG
495             $min = $theta;
496         } else {
497         }
498
499         # We also count the number of functions that make a
500         # smaller angle with this circuit than it's intended
501         # function makes with its measured output. In other words,
502         # this gives us the rank of the intended function.
503         # Whenever this rank is not 0, we consider the circuit as
504         # having "failed" or being "dysfunctional." This is a
505         # rather strict criterion, as the intended function may
506         # lose out to some other function even by a fraction of an

```

```

507         # angle for the circuit to be considered dysfunctional.
508         if ($theta < $selfTheta) {
509             $rank++;
510         }
511     }
512
513
514
515     # Next, we perform a similar computation of angles, but this
516     # time between intended boolean function, and all other
517     # boolean functions. Note, that this does not use the measured
518     # values and is intended to provide a baseline angular
519     # difference between this and other functions. Note that this
520     # value is a fundamental value arising from boolean logic and
521     # algebra.
522
523     # We perform this computation for all eight output values.
524     $ttTTDotProduct = 0.0;
525     my $c1 = $circuit{"$circuitId1"}{truthTable};
526     for my $row (keys %{$c1}) {
527         $ttTTDotProduct
528             += (
529             $circuit{"$circuitId1"}{truthTable}{$row}{truthTableOutput}
530             * $circuit{"$circuitId2"}{truthTable}{$row}{truthTableOutput}
531             );
532     }
533     if (
534         $circuit{"$circuitId1"}{truthTableVectorMag} > 0 &&
535         $circuit{"$circuitId2"}{truthTableVectorMag} > 0
536     ) {
537         $TTCosTheta
538             = sprintf(
539                 "%2.5f",
540                 $ttTTDotProduct /
541                 ($circuit{"$circuitId1"}{truthTableVectorMag} * $circuit{"$circuitId2"}{truthTableVectorMag})
542             );
543         $TTTheta = rad2deg(acos($TTCosTheta));
544     } else {
545         $TTTheta = "Undefined";
546     }
547
548
549     # Again, we save this value for each boolean function, against
550     # all other boolean functions.
551     $circuit{$circuitId1}{distanceTo}{$circuitId2}{truthTableTheta} = sprintf("%2.2f", $TTTheta);
552
553

```

```
553     }
554 }
555
556 # We mark circuits whose intended functions do not have the
557 # minimum angle as dysfunctional.
558 if (!( $\$$ circuit{ $\$$ minCircuit}{hexTruthTable} eq  $\$$ circuit{" $\$$ circuitId1"}{hexTruthTable})) {
559      $\$$ dysfunc++;
560      $\$$ circuit{" $\$$ circuitId1"}{dysfunctional} = "Yes";
561 } else {
562      $\$$ circuit{" $\$$ circuitId1"}{dysfunctional} = "No";
563 }
564
565 # We also save the succinct descriptor, angle, and identifier of the boolean function
566 # that has the smallest angle with the intended function.
567  $\$$ circuit{" $\$$ circuitId1"}{closestTruthTable} =  $\$$ circuit{ $\$$ minCircuit}{hexTruthTable};
568  $\$$ circuit{" $\$$ circuitId1"}{thetaClosest} =  $\$$ min;
569  $\$$ circuit{" $\$$ circuitId1"}{closestCircuitId} =  $\$$ minCircuit;
570  $\$$ circuit{" $\$$ circuitId1"}{intendedTruthTableRank} =  $\$$ rank;
571 }
572 }
573
574 # We also compute a measure of circuit quality similar to one defined
575 # in the literature (see Nielsen et al. Science 2016). Known as "dynamic
576 # range," we define this as the difference between the minimum
577 # measured output where the intended boolean output is 1, and the
578 # maximum measured outwhere where the intended boolean function is 0.
579 # Thus, it's a "worst case" difference in the range of measured output
580 # values.
581 computeDynamicRange();
582
583  $\$$ count = keys %circuit;
584
585 # We can persist the data collated and computed into files. We save
586 # fields as needed in comma-separated form to file.
587 exportAsCSV();
588
589 # We can compute and save histograms to summarize circuits.
590 saveAngleHistogram();
591
592
593 # We save the entire hash table, as is, to file.
594 # To minimize useless records, we remove unbuilt circuits.
595
596 for my  $\$$ key (keys %circuit) {
597     if ( $\$$ circuit{ $\$$ key}{built} =~ /No/) {
598         delete  $\$$ circuit{ $\$$ key};
599     }
600 }
```

```
599     }
600 }
601
602 # We configure the JSON to print with readable formatting.
603 my $json = JSON->new;
604 $json = $json->pretty(1);
605 $json = $json->canonical(1);
606 my $exportJSON = $json->encode(\%circuit);
607
608 open(JS, ">JSON-$inFile.json") or die;
609 print JS $exportJSON;
610 close(JS);
611
612
613
614 # Done.
615 exit;
616
617 # Computes a histogram by angular distance between intended and
618 # measured outputs, across all circuits.
619 sub saveAngleHistogram {
620
621     my %histogram = ();
622     my $total = 0;
623
624     for my $key (keys %circuit) {
625         if ($circuit{$key}{built} =~ /Yes/) {
626             my $kk = ceil($circuit{$key}{theta});
627             if (exists $histogram{$kk}) {
628                 $histogram{$kk}{count}++;
629             } else {
630                 $histogram{$kk}{count} = 1;
631                 $histogram{$kk}{fraction} = 0.0;
632             }
633             $total++;
634         }
635     }
636
637     my $cumu = 0.0;
638     open(HIS, ">HIST-$inFile.dat") or die;
639     for my $key (sort {$a <=> $b} keys %histogram) {
640         my $frac = $histogram{$key}{count} / $total;
641         $cumu += $frac;
642         print HIS "$key $histogram{$key}{count} $cumu\n";
643     }
644     close(HIS);

```

```

645 }
646 }
647
648 # Computes a histogram of ranks across all circuits.
649 sub saveRankHistogram {
650
651     my %histogram = ();
652     my $total = 0;
653
654     for my $key (keys %circuit) {
655         if ($circuit{$key}{built} =~ /Yes/) {
656             my $kk = $circuit{$key}{intendedTruthTableRank};
657             if (exists $histogram{$kk}) {
658                 $histogram{$kk}{count}++;
659             } else {
660                 $histogram{$kk} = 1;
661                 $histogram{$kk}{fraction} = 0.0;
662             }
663             $total++;
664         }
665     }
666
667     my $cumu = 0.0;
668     open(HIS, ">HIST-$inFile.dat") or die;
669     for my $key (sort {$a <=> $b} keys %histogram) {
670         my $frac = $histogram{$key}{count} / $total;
671         $cumu += $frac;
672         print HIS "$key $histogram{$key}{count} $cumu\n" ;
673     }
674     close(HIS);
675 }
676 }
677
678 # Persists compiled data in comma-separated form to a file.
679 sub exportAsCSV {
680
681     my $circuitId1;
682
683     open(OUT, ">OUTPUT-from-$inFile") or die;
684
685     # We may want to print out column headings for each column.
686     #print OUT "CircuitId, Structure, HexGFP.MChTruthTable, GFPDynamicRange, MChDynamicRange,
687     #GFPcappedDynamicRange, MChCappedDynamicRange, Theta, IntendedTTRank,
688     #HexClosestGFP.MChTruthTable, ClosestTheta, Dysfunctional\n";
689
690

```

```

691   for my $circuitId1 (sort {$a <=> $b} keys %circuit) {
692
693       if ($circuit{$circuitId1}{built} =~ /Yes/) {
694
695           $structure = $circuit{$circuitId1}{structure};
696           $hexTT = $circuit{$circuitId1}{hexGfpTruthTable} . $circuit{$circuitId1}{hexMchTruthTable};
697           $GFPdr = $circuit{$circuitId1}{gfpDynamicRange};
698           $MChdr = $circuit{$circuitId1}{mchDynamicRange};
699           $GFPCappedDr = $circuit{$circuitId1}{gfpCappedDynamicRange};
700           $MChCappedDr = $circuit{$circuitId1}{mchCappedDynamicRange};
701           $theta = sprintf("%2.2f", $circuit{$circuitId1}{theta});
702           $intendedRank = $circuit{$circuitId1}{intendedTruthTableRank};
703           $closestTT
704             = "0x"
705               . $circuit{$circuit{$circuitId1}{closestCircuitId}}{hexGfpTruthTable}
706               . $circuit{$circuit{$circuitId1}{closestCircuitId}}{hexMchTruthTable};
707           $closestTheta = sprintf("%2.2f", $circuit{$circuitId1}{thetaClosest});
708           $dysfunc = $circuit{$circuitId1}{dysfunctional};
709           $closestCircuitId = $circuit{$circuitId1}{closestCircuitId};
710
711           print OUT "$circuitId1 $structure $hexTT $GFPdr $MChdr $GFPCappedDr ";
712           print OUT "$MChCappedDr $theta $intendedRank $closestTT $closestTheta $dysfunc\n";
713       }
714   }
715   close(OUT);
716 }
717
718 # Computes worst case dynamic range of measured outputs for all
719 # circuits.
720 sub computeDynamicRange {
721     my $circuitId1;
722
723     # We compute dynamic range for all circuits. The dynamic range is
724     # the difference between:
725     #   highest measured output when the function output is defined
726     #   to be 0, and
727     #   the lowest measured output when the function output is defined
728     #   to be 1.
729     # NOTE that this may not be defined for certain functions where
730     # all outputs are 0, or 1.
731     # Since we perform this computation for all outputs together and
732     # by separating the two outputs, the dynamic range may not be
733     # defined where either of the outputs is either always 1 or 0.

```



```

737 # Also NOTE that we compute this range for capped and uncapped
738 # mean values.
739 for my $circuitId1 (keys %circuit) {
740
741     ## Is dynamic range defined for GFP?
742     if (
743         $circuit{"$circuitId1"}{truthTableTotalOnesGfp} > 0 &&
744         $circuit{"$circuitId1"}{truthTableTotalOnesGfp} < 4
745     ) {
746
747         my $minOn = 1e6;
748         my $maxOff = -1;
749         my $cappedMinOn = 1e6;
750         my $cappedMaxOff = -1;
751
752         my $c1 = $circuit{"$circuitId1"}{truthTableGfp};
753         for my $row (keys %{$c1}) {
754
755             # We first deal with uncapped GFP output, and find
756             # cases where the function output is 1, and the GFP
757             # output is the lowest.
758             if (
759                 $circuit{"$circuitId1"}{truthTableGfp>{"$row"}{truthTableOutput} == 1 &&
760                 $circuit{"$circuitId1"}{truthTableGfp>{"$row"}{uncappedMean} < $minOn
761             ) {
762                 $minOn = $circuit{"$circuitId1"}{truthTableGfp>{"$row"}{uncappedMean};
763             }
764
765             # Next, we find cases where the function output is 0, and the GFP
766             # output is the highest.
767             if (
768                 $circuit{"$circuitId1"}{truthTableGfp>{"$row"}{truthTableOutput} == 0 &&
769                 $circuit{"$circuitId1"}{truthTableGfp>{"$row"}{uncappedMean} > $maxOff
770             ) {
771                 $maxOff = $circuit{"$circuitId1"}{truthTableGfp>{"$row"}{uncappedMean};
772             }
773
774             ## We do the same for capped values of GFP.
775             if (
776                 $circuit{"$circuitId1"}{truthTableGfp>{"$row"}{truthTableOutput} == 1 &&
777                 $circuit{"$circuitId1"}{truthTableGfp>{"$row"}{mean} < $cappedMinOn
778             ) {
779                 $cappedMinOn = $circuit{"$circuitId1"}{truthTableGfp>{"$row"}{mean};
780             }
781
782

```

```

783         if (
784             $circuit{"$circuitId1"}{truthTableGfp>{"$row"}{truthTableOutput} == 0 &&
785             $circuit{"$circuitId1"}{truthTableGfp>{"$row"}{mean} > $cappedMaxOff
786         ) {
787             $cappedMaxOff = $circuit{"$circuitId1"}{truthTableGfp>{"$row"}{mean};
788         }
789     }
790
791     $drGFP = $minOn - $maxOff;
792     $cappedDrGFP = $cappedMinOn - $cappedMaxOff;
793
794     $circuit{"$circuitId1"}{gfpDynamicRange} = $drGFP;
795     $circuit{"$circuitId1"}{gfpCappedDynamicRange} = $cappedDrGFP;
796
797 } else {
798     $circuit{"$circuitId1"}{gfpDynamicRange} = "Undefined";
799     $circuit{"$circuitId1"}{gfpCappedDynamicRange} = "Undefined";
800 }
801
802
803
804
805
806
807 # We repeat the above for mCherry.
808 #
809 if (
810     $circuit{"$circuitId1"}{truthTableTotalOnesMch} > 0 &&
811     $circuit{"$circuitId1"}{truthTableTotalOnesMch} < 4
812 ) {
813
814     my $minOn = 1e6;
815     my $maxOff = -1;
816     my $cappedMinOn = 1e6;
817     my $cappedMaxOff = -1;
818
819     my $c1 = $circuit{"$circuitId1"}{truthTableMch};
820     for my $row (keys %{$c1}) {
821
822         if (
823             $circuit{"$circuitId1"}{truthTableMch>{"$row"}{truthTableOutput} == 1 &&
824             $circuit{"$circuitId1"}{truthTableMch>{"$row"}{uncappedMean} < $minOn
825         ) {
826             $minOn = $circuit{"$circuitId1"}{truthTableMch>{"$row"}{uncappedMean};
827         }
828

```

```

829     if (
830         $circuit{"$circuitId1"}{truthTableMch>{"$row"}{truthTableOutput} == 0 &&
831         $circuit{"$circuitId1"}{truthTableMch>{"$row"}{uncappedMean} > $maxOff
832     ) {
833         $maxOff = $circuit{"$circuitId1"}{truthTableMch>{"$row"}{uncappedMean};
834     }
835
836
837     if (
838         $circuit{"$circuitId1"}{truthTableMch>{"$row"}{truthTableOutput} == 1 &&
839         $circuit{"$circuitId1"}{truthTableMch>{"$row"}{mean} < $cappedMinOn
840     ) {
841         $cappedMinOn = $circuit{"$circuitId1"}{truthTableMch>{"$row"}{mean};
842     }
843
844     if (
845         $circuit{"$circuitId1"}{truthTableMch>{"$row"}{truthTableOutput} == 0 &&
846         $circuit{"$circuitId1"}{truthTableMch>{"$row"}{mean} > $cappedMaxOff
847     ) {
848         $cappedMaxOff = $circuit{"$circuitId1"}{truthTableMch>{"$row"}{mean};
849     }
850
851 }
852
853 $drMch = $minOn - $maxOff;
854 $cappedDrMch = $cappedMinOn - $cappedMaxOff;
855
856 $circuit{"$circuitId1"}{mchDynamicRange} = $drMch;
857 $circuit{"$circuitId1"}{mchCappedDynamicRange} = $cappedDrMch;
858
859 } else {
860     $circuit{"$circuitId1"}{mchDynamicRange} = "Undefined";
861     $circuit{"$circuitId1"}{mchCappedDynamicRange} = "Undefined";
862 }
863 }
864 }
865
866
867
868
869
870
871 # Adds 1 mod 2 to a vector of bits, to generate all boolean functions in lexicographic sequence.
872 # The *global* vector of bits is called bitVector and is assumed to be initially vec zero.
873
874 sub getNextTT {

```

```
875
876 my $i;
877 my $carry = 1;
878
879 # Begin at the end of the bitVector, i.e. at index $#bitVector, and go all the way down to index
880 # 0. Look for an index that's 0. If you find it, toggle it, and you've added 1. You're done.
881 # If you see a 1, toggle it to 0, remember carry, and continue.
882
883 for ($i=$#bitVector; $i>-1 and $carry == 1; $i--) {
884     if ($bitVector[$i] == 0) {
885         $bitVector[$i] = 1;
886         $carry = 0;
887     } else {
888         $bitVector[$i] = 0;
889     }
890 }
891
892 # If, at the end, you're holding a carry, it means you have an overflow, which in turn means
893 # you're done enumerating all boolean functions.
894 return ($carry ? 0 : 1);
895 }
```
